# Supplementary material for: Heart failure-induced atrial remodelling promotes electrical and conduction alternans
Source: PubMed Central journal article supplement (PMC7402519; doi:10.1371/journal.pcbi.1008048), 2020-07-13
Supplement: pcbi.1008048.s009.pdf [file pcbi.1008048.s009.pdf]

S1 Table. Relative contribution of each parameter by varying different degrees in HF model at a time. The values of APD<sub>90</sub>, CaT amplitude and SR Ca<sup>2+</sup> content were computed relative to control, and the bold font demonstrated the HF model.

| Parameters     | Relative to control | APD <sub>90</sub> | CaT amplitude    | JSR Ca <sup>2+</sup> content |
|----------------|---------------------|-------------------|------------------|------------------------------|
| $K_{up}$       | -90%                | +52.7%            | +73.0%           | +424.3%                      |
|                | <b>-78%</b>         | <b>+ 33.0%</b>    | <b>+36.7%</b>    | <b>+275.6%</b>               |
|                | -65%                | +13.3%            | +10.1%           | +178.8%                      |
|                | -50%                | <b>-1.5%</b>      | <b>-9.6%</b>     | +115.5%                      |
|                | -25%                | <b>-14.7%</b>     | <b>-29.4%</b>    | +56.3%                       |
|                | -0%                 | <b>-21.3%</b>     | <b>-41.4%</b>    | + 22.7%                      |
| $J_{up(max)}$  | -50%                | +7.9%             | + 0.8%           | +143.4%                      |
|                | <b>-30%</b>         | <b>+ 33.0%</b>    | <b>+36.7%</b>    | <b>+275.6%</b>               |
|                | -10%                | +44.1%            | +72.4%           | +431.3%                      |
|                | -0%                 | +45.3%            | +88.7%           | +511.2%                      |
| $G_{Ca}$       | -50%                | +14.3%            | +22.2%           | +251.0%                      |
|                | <b>-30%</b>         | <b>+ 33.0%</b>    | <b>+36.7%</b>    | <b>+275.6%</b>               |
|                | -10%                | +51.7%            | +54.1%           | +316.3%                      |
|                | -0%                 | +59.5%            | +62.5%           | +338.1%                      |
| $J_{rel(max)}$ | -80                 | +17.7%            | + 7.46%          | +441.1%                      |
|                | <b>-60%</b>         | <b>+ 33.0%</b>    | <b>+36.7%</b>    | <b>+275.6%</b>               |
|                | -40%                | +37.8%            | +50.0%           | +187.8%                      |
|                | -0%                 | +40.7%            | +61.8%           | +101.7%                      |
| $G_{to}$       | -70%                | +37.9%            | +40.4%           | +291.0%                      |
|                | <b>-50%</b>         | <b>+ 33.0%</b>    | <b>+36.7%</b>    | <b>+275.6%</b>               |
|                | -30%                | + 25.2%           | + 31.9%          | +256.4%                      |
|                | -0%                 | +8.9%             | +24.2%           | +227.7%                      |
| $G_{Ks}$       | -65%                | +33.5845%         | +36.8497%        | +276.1151%                   |
|                | <b>-45%</b>         | <b>+ 33.0463%</b> | <b>+36.6987%</b> | <b>+275.5902%</b>            |
|                | -25%                | +32.5188%         | +36.5502 %       | +275.0745%                   |
|                | -0%                 | +31.8%            | +36.3%           | +274.4%                      |
| $[Csqn]_{max}$ | -30%                | +31.7869%         | +36.6476%        | +274.9764%                   |
|                | <b>-15%</b>         | <b>+ 33.0463%</b> | <b>+36.6987%</b> | <b>+275.5902%</b>            |
|                | -5%                 | + 33.6383%        | +36.7197%        | +275.8681%                   |
|                | -0%                 | +33.8%            | +36.7%           | +275.9%                      |
